# Supplementary material for: A novel method for pair-matching using three-dimensional digital models of bone: mesh-to-mesh value comparison
Source: Springer Nature journal article supplement (doi:10.1007/s00414-016-1334-3), 2016-03-10
Supplement: MOESM2 [file 8447872]

### Mesh-to-mesh Values Example Data

| Left sides<br>↓<br>v | Right sides --> |       |       |       |       |
|----------------------|-----------------|-------|-------|-------|-------|
|                      | 1               | 2     | 7     | 8     | 10    |
| 3                    | 2.002           | 2.511 | 3.06  | 2.011 | 1.654 |
| 4                    | 2.296           | 1.249 | 1.51  | 0.546 | 1.784 |
| 5                    | 2.169           | 0.65  | 1.87  | 1.092 | 2.191 |
| 6                    | 2.296           | 3.207 | 1.729 | 3.113 | 2.194 |
| 12                   | 0.716           | 1.609 | 0.634 | 1.781 | 1.454 |
| 14                   | 0.688           | 2.458 | 3.007 | 2.021 | 2.284 |

Text in **Red** = Potential match due to low mesh-to-mesh value (value < 1)

### Three lowest values starting with the Lefts (going across each row from left to right)

| Lefts<br>↓<br>v | Rights --> |       |       |       |       |
|-----------------|------------|-------|-------|-------|-------|
|                 | 1          | 2     | 7     | 8     | 10    |
| 3               |            |       |       |       |       |
| 4               |            | 1.249 | 1.51  | 0.546 |       |
| 5               |            | 0.65  |       | 1.092 |       |
| 6               |            |       |       |       |       |
| 12              | 0.716      |       | 0.634 |       | 1.454 |
| 14              | 0.688      |       |       |       |       |

Lowest Value

Second Lowest Value

Third Lowest Value

Text in **Yellow** = True Match

**Three lowest values starting with the Rights (going down each column from top to bottom)**

| Lefts<br>↓ | Rights --> |       |       |       |       |
|------------|------------|-------|-------|-------|-------|
|            | 1          | 2     | 7     | 8     | 10    |
| 3          |            |       |       |       |       |
| 4          |            | 1.249 | 1.51  | 0.546 |       |
| 5          |            | 0.65  |       | 1.092 |       |
| 6          |            |       |       |       |       |
| 12         | 0.716      |       | 0.634 |       | 1.454 |
| 14         | 0.688      |       |       |       |       |

|              |                     |                    |
|--------------|---------------------|--------------------|
| Lowest Value | Second Lowest Value | Third Lowest Value |
|--------------|---------------------|--------------------|

Text in Yellow = True Match

**Combined lowest values**

| Lefts<br>↓ | Rights --> |       |       |       |       |       |       |       |       |       |
|------------|------------|-------|-------|-------|-------|-------|-------|-------|-------|-------|
|            | 1          |       | 2     |       | 7     |       | 8     |       | 10    |       |
| 3          |            |       |       |       |       |       |       |       |       |       |
| 4          |            |       | 1.249 | 1.249 | 1.51  | 1.51  | 0.546 | 0.546 |       |       |
| 5          |            |       | 0.65  | 0.65  |       |       | 1.092 | 1.092 |       |       |
| 6          |            |       |       |       |       |       |       |       |       |       |
| 9          |            |       |       |       |       |       |       |       |       |       |
| 12         | 0.716      | 0.716 |       |       | 0.634 | 0.634 |       |       | 1.454 | 1.454 |
| 14         | 0.688      | 0.688 |       |       |       |       |       |       |       |       |

|                  |                  |               |
|------------------|------------------|---------------|
| Lowest Value (L) | Lowest Value (R) | True Negative |
|------------------|------------------|---------------|

Text in Yellow = True Match

**True Pair Matches**

| <b>Left</b> | <b>Right</b> |
|-------------|--------------|
| 3           | 63           |
| 4           | 8            |
| 5           | 2            |
| 6           | 57           |
| 12          | 7            |
| 14          | 1            |
