# Supplementary material for: A novel method for pair-matching using three-dimensional digital models of bone: mesh-to-mesh value comparison
Source: Springer Nature journal article supplement (doi:10.1007/s00414-016-1334-3), 2016-03-10
Supplement: MOESM3 [file 8447872]

| <b>Visual Pair-Matching</b> |         |
|-----------------------------|---------|
| True positive               | 22      |
| False negative              | 2       |
| False positive              | 0       |
| True negative               | 14      |
|                             |         |
| Sensitivity                 | 91.67%  |
| Specificity                 | 100.00% |
