# Supplementary material for: A novel method for pair-matching using three-dimensional digital models of bone: mesh-to-mesh value comparison
Source: Springer Nature journal article supplement (doi:10.1007/s00414-016-1334-3), 2016-03-10
Supplement: MOESM4 [file 8447872]

| <b>Osteometric Comparison</b> |        |
|-------------------------------|--------|
| True positive                 | 19     |
| False negative                | 26     |
| False positive                | 3      |
| True negative                 | 65     |
|                               |        |
| Sensitivity                   | 42.22% |
| Specificity                   | 95.59% |
